# Supplementary material for: Cortical changes associated with an anterior cruciate ligament injury may retrograde skilled kicking in football: preliminary EEG findings
Source: Springer Nature journal article supplement (doi:10.1038/s41598-025-86196-4), 2025-01-16
Supplement: MOESM1 [file 41598_2025_86196_MOESM1_ESM.pdf]

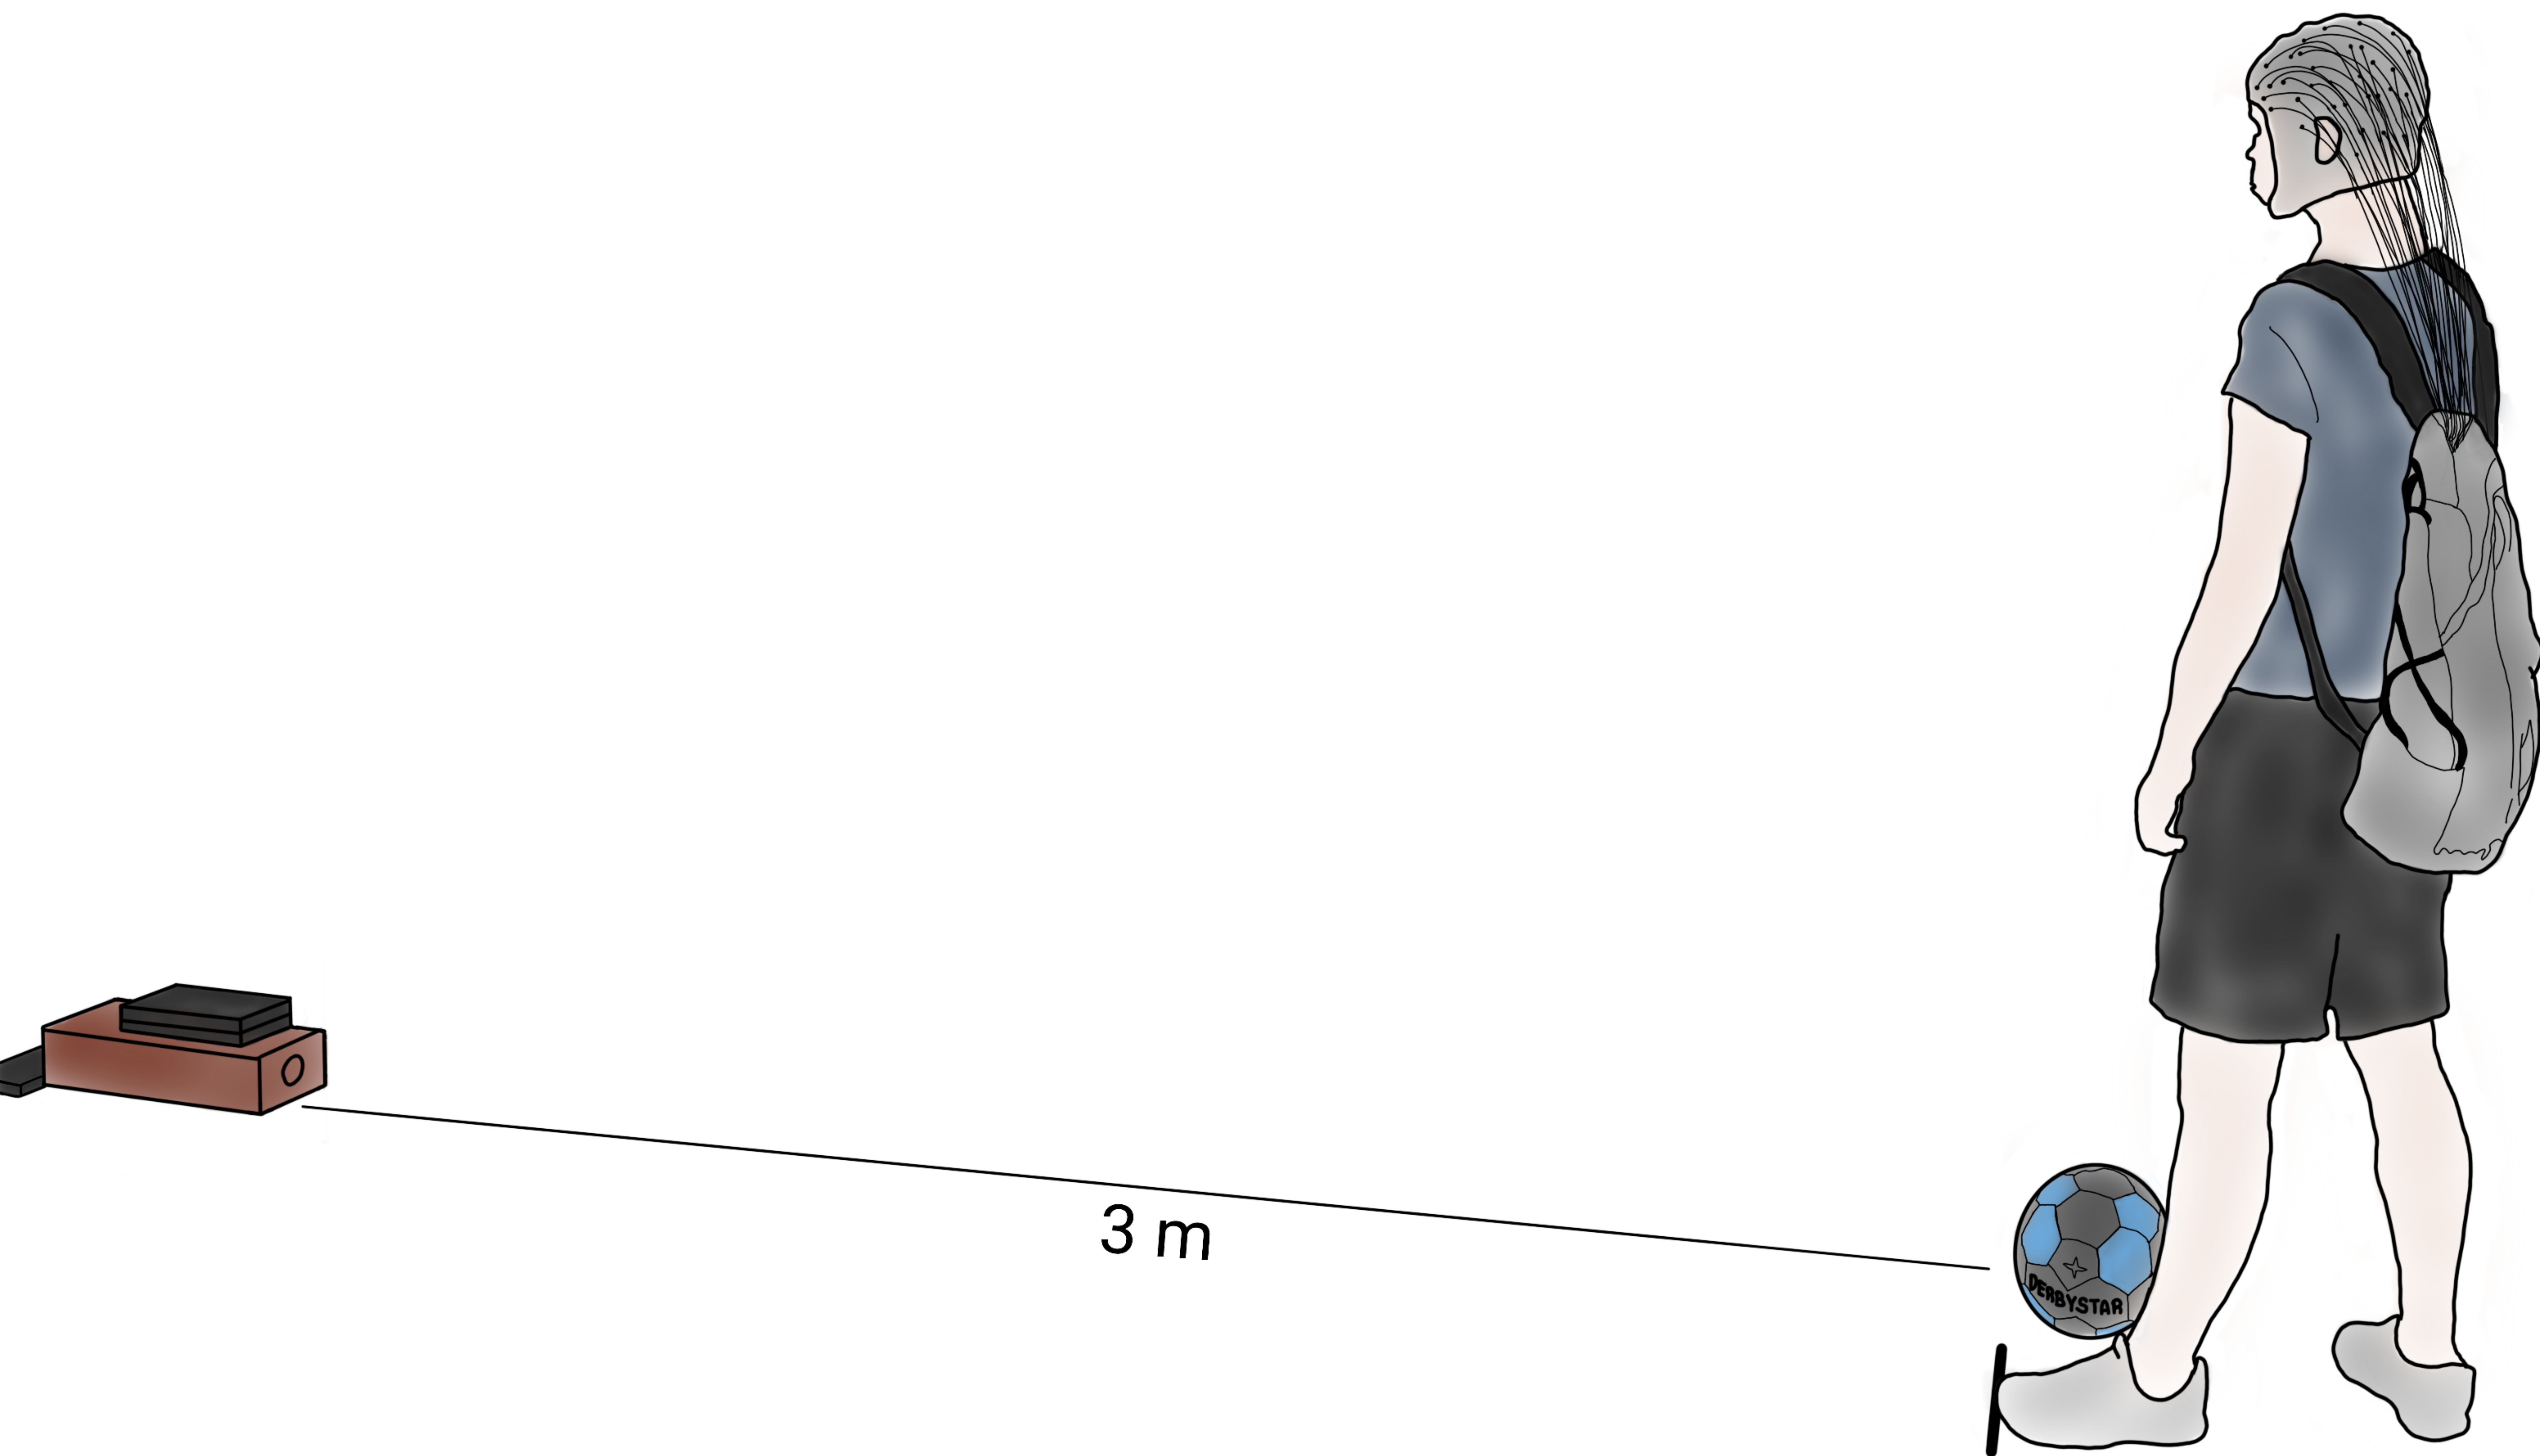

The short-distance kicking task. Participants executed instep kicks with their dominant (right) foot towards a target placed at 3 meters.
